# Supplementary material for: Validation of a spatial agent-based model for Taenia solium transmission (“CystiAgent”) against a large prospective trial of control strategies in northern Peru
Source: PLoS Negl Trop Dis. 2021 Oct 27;15(10):e0009885. doi: 10.1371/journal.pntd.0009885 (PMC8575314; doi:10.1371/journal.pntd.0009885)
Supplement: S1 Data — (CSV) [file pntd.0009885.s002.csv]

village	Intervention	Part_PigTrt	Part_HumanScreen	Part_HumanPostScreenTrt	Part_HumanTrt1dose	Part_HumanTrt2dose	Part_HumanMassTrt	BaseSeroprev	BaseTN	BasePC	FinalSeroprev	FinalTN	FinalPC	Seroinc0	Seroinc1	Seroinc2	Seroinc3	Seroinc4	Seroinc5	Seroinc6	BaseTN_sim	FinalTN_sim	BasePC_sim	FinalPC_sim	sero0_sim	sero1_sim	sero2_sim	sero3_sim	sero4_sim	sero5_sim	sero6_sim
563	Ring Scr	NA	0.792	0.918	NA	NA	NA	0.5	0.0267	0.1725	0.238	0.0022	0.08211	0.593	0.27	0.168	0.2	0.281	0.209	0.212	0.0299295774647887	0.00178890876565295	0.25	0.054011154011154	0.609056732740943	0.517921377183967	0.372093023255814	0.268013343217198	0.194920174165457	0.153977871443625	0.118884540117417
570	Mass Trt	NA	NA	NA	NA	NA	0.703	0.234	0.0114	0.08073	0.056	0	0.01932	0.111	0.2	0.038	0.077	0.111	0.182	0.033	0.0092807924203273	0	0.122941970310391	0.0219806763285024	0.193376068376068	0.107817494914269	0.0789473684210526	0.0588235294117647	0.0185185185185185	0.0204422194409679	0
572	Mass Trt	NA	NA	NA	NA	NA	0.738	0.238	0.0116	0.08211	0.117	0.006	0.040365	0.271	0.188	0.144	0.122	0.234	0.188	0.059	0.012012012012012	0.0014903129657228	0.112	0.0291085613415711	0.3	0.178646669865042	0.140658619784833	0.118609902977584	0.072622502511441	0.0661808796308366	0.0622702731813714
573	Ring Scr	NA	0.745	0.918	NA	NA	NA	0.298	0.014	0.10281	0.114	0.0035	0.03933	0.136	0.184	0.076	0.118	0.125	0.053	0.073	0.0168674698795181	0	0.146122057104692	0.0294117647058824	0.162567480460881	0.13668207930503	0.088099128540305	0.0619469026548673	0.042989751344086	0.0310612828300875	0.0232173109502541
575	Ring Trt (P)	0.644	NA	NA	0.12	0.72	NA	0.382	0.0183	0.13179	0.295	0.0068	0.101775	0.412	0.333	0.227	0.339	0.143	0.148	0.239	0.0191939286766873	0	0.179887640449438	0.0114289446185998	0.444994499449945	0.316666666666667	0.206267386679758	0.144927536231884	0.113269794721408	0.0683374844333748	0.0106382978723404
576	Ring Scr	NA	0.854	0.918	NA	NA	NA	0.392	0.0189	0.13524	0.133	0.0055	0.045885	0.315	0.182	0.121	0.133	0.162	0.161	0.114	0.0169496935648621	0	0.156028368794326	0.0306045988854025	0.336372679045093	0.262892078681552	0.184782608695652	0.129361054766734	0.104102167182663	0.081275406504065	0.0373134328358209
577	Ring Scr (P)	0.264	0.884	0.918	NA	NA	NA	0.348	0.0164	0.12006	0.123	0.0105	0.042435	0.559	0.235	0.067	0.216	0.134	0.16	0.065	0.0151930956212851	0	0.158620689655172	0.0194176790950985	0.573170731707317	0.460600236546422	0.321469998945481	0.238831272437176	0.169567191283293	0.129310344827586	0.0944658992913651
578	Ring Scr	NA	0.881	0.918	NA	NA	NA	0.458	0.0234	0.15801	0.045	0	0.015525	0.333	0.273	0.056	0.174	0.02	0.052	0.052	0.0257234726688103	0.003584229390681	0.22093023255814	0.0604235122307411	0.3701166920345	0.333333333333333	0.244897959183673	0.184412955465587	0.153846153846154	0.123595505617978	0.109482020547945
579	Ring Scr (P)	0.619	0.786	0.918	NA	NA	NA	0.613	0.0383	0.211485	0.333	0.0427	0.114885	0.727	0.271	0.147	0.345	0.348	0.14	0.301	0.0380434782608696	0	0.260869565217391	0.0213909860443834	0.69309262166405	0.581818181818182	0.413418290854573	0.283766353418095	0.210526315789474	0.156294904388195	0.0682494501229137
580	Ring Trt (P)	0.753	NA	NA	0.13	0.76	NA	0.468	0.0241	0.16146	0.213	0.0151	0.073485	0.442	0.24	0.444	0.276	0.227	0.265	0.143	0.0269330044913528	0.00173611111111111	0.206089038186803	0.0114942528735632	0.441124936515998	0.30924158714214	0.172628567366812	0.104290974803096	0.0676156583629893	0.0480593139264726	0.0372687096304211
581	Mass Trt (P)	0.818	NA	NA	NA	NA	0.756	0.253	0.0121	0.087285	0.118	0.0048	0.04071	0.053	0.222	0.094	0.106	0.177	0.101	0.037	0.0110092113768584	0	0.116369047619048	0	0.25862524785195	0.132067943456452	0.088365434669443	0.0519037356321839	0	0	0
582	Mass Trt (P)	0.9	NA	NA	NA	NA	0.735	0.444	0.0223	0.15318	0.188	0.0034	0.06486	0.542	0.517	0.32	0.28	0.272	0.205	0.126	0.0214030915576694	0.00113443031393412	0.194491846795601	0.0123456790123457	0.562706953642384	0.348286656604617	0.255483405483405	0.184769355821987	0.0932051515703785	0.0757077352472089	0.0604634898432781
583	Mass Trt	NA	NA	NA	NA	NA	0.78	0.438	0.0219	0.15111	0.216	0.0053	0.07452	0.5	0.45	0.395	0.194	0.323	0.182	0.2	0.0216138777289856	0	0.192539388322521	0.0543478260869565	0.522727272727273	0.322478991596639	0.272727272727273	0.235294117647059	0.142857142857143	0.124038461538462	0.106904761904762
584	Ring Trt (P)	0.702	NA	NA	0.18	0.67	NA	0.526	0.029	0.18147	0.214	0.0096	0.07383	0.588	0.563	0.393	0.323	0.145	0.125	0.073	0.0352960496511733	0.00307692307692308	0.241171582883257	0.0258075258075258	0.605661881977671	0.48780487804878	0.342481203007519	0.244173441734417	0.178174603174603	0.127783275606136	0.09375
585	Mass Trt	NA	NA	NA	NA	NA	0.815	0.468	0.0241	0.16146	0.529	0	0.182505	0.5	0.333	0.583	0.318	0.367	0.233	0.452	0.0247729318386384	0	0.204973741118319	0.0428571428571429	0.488630490956072	0.27906976744186	0.223880597014925	0.181818181818182	0.100847457627119	0.0889466546112116	0.0894189765458422
586	Mass Trt (P)	0.853	NA	NA	NA	NA	0.762	0.375	0.0179	0.129375	0.2	0.0053	0.069	0.333	0.2	0.526	0.318	0.2	0.275	0.213	0.0219607978228668	0	0.188827811617887	0	0.362403993855607	0.210526315789474	0.148170469220835	0.0962758620689655	0.0393479607183933	0.0195441813088872	0
587	Ring Trt	NA	NA	NA	0.27	0.61	NA	0.52	0.0285	0.1794	0.163	0.0074	0.056235	0.783	0.353	0.447	0.2	0.122	0.192	0.07	0.0312945156695157	0.00259067357512953	0.236761761761762	0.0437728102189781	0.794319097502014	0.678571428571429	0.566265060240964	0.467943448956107	0.386048395261719	0.307354925775978	0.257142857142857
588	Ring Trt	NA	NA	NA	0.12	0.73	NA	0.554	0.0317	0.19113	0.249	0.0212	0.085905	0.559	0.463	0.482	0.358	0.351	0.26	0.2	0.0352507108293979	0.00369685907442615	0.241269841269841	0.0643462469733656	0.576696832579185	0.488545111006141	0.384615384615385	0.304915842906759	0.253952733627361	0.203288540752245	0.165412895927602
589	Ring Scr (P)	0.741	0.895	0.918	NA	NA	NA	0.144	0.0086	0.04968	0.057	0.0039	0.019665	0.189	0	0.13	0.077	0.065	0.075	0.038	0.0114613180515759	0	0.0776545500548199	0.00803329461866047	0.241801075268817	0.202465297860035	0.141732283464567	0.112903225806452	0.0810810810810811	0.0649827963715984	0.0529803906280457
590	Ring Scr (P)	0.676	0.827	0.918	NA	NA	NA	0.529	0.0293	0.182505	0.274	0.0086	0.09453	0.5	0.238	0.312	0.075	0.163	0.307	0.252	0.0312125299760192	0.0022497216317441	0.226488797169811	0.0220184227537169	0.5	0.426747967479675	0.280487804878049	0.183417437622652	0.121089931573803	0.088858252913899	0.0606060606060606
591	Ring Trt (P)	0.6	NA	NA	0.15	0.75	NA	0.323	0.0152	0.111435	0.201	0.0173	0.069345	0.25	0.222	0.125	0.13	0.079	0.093	0.14	0.014598556019485	0	0.142857142857143	0.00826446280991736	0.247884218761112	0.179217273954116	0.110727969348659	0.0731707317073171	0.0496894409937888	0.0362977602108037	0.0232558139534884
